# Supplementary material for: Mood Disorders and Outcomes of COVID-19 Hospitalizations
Source: Atypon-hosted journal article supplement (doi:10.1176/appi.ajp.2020.20060842), 2021-04-06
Supplement: appi.ajp.2020.20060842.ds001.pdf [file appi.ajp.2020.20060842.ds001.pdf]

Supplemental Table S1. Mortality hazard (2nd time period) in fully-adjusted Cox regression model, split at varied time points

| <b>Split time</b> | <b>rationale</b> | <b>HR</b> | <b>[95% CI]</b> |       |
|-------------------|------------------|-----------|-----------------|-------|
| 276h              | 20% - 24h        | 1.548     | 1.066           | 2.247 |
| 12 days           | a priori         | 1.526     | 1.045           | 2.228 |
| 300h              | actual 20%       | 1.594     | 1.087           | 2.337 |
| 324h              | 20% + 24h        | 1.516     | 1.004           | 2.289 |
